# Supplementary material for: Transcriptional Portrait of Actinobacillus pleuropneumoniae during Acute Disease - Potential Strategies for Survival and Persistence in the Host
Source: PLOS journal article supplement (doi:10.1371/journal.pone.0035549), 2012-04-17
Supplement: S6 (10.1371/journal.pone.0035549.s006) [file journal.pone.0035549.s006]

**Table S5.** Genes found to be differentially expressed in the present and other expression studies of *A. pleuropneumoniae* or *H. influenzae*.

| Gene designation                               | Locus no. | Annotation                                                     | This study | I    | II   | III  | IV    | V    | VI   | VII  |
|------------------------------------------------|-----------|----------------------------------------------------------------|------------|------|------|------|-------|------|------|------|
| <i>Energy production and conversion</i>        |           |                                                                |            |      |      |      |       |      |      |      |
| nrfC                                           | APL_0102  | Nitrate reductase                                              | Diff expr  |      | up   |      |       |      |      |      |
| glpK                                           | APL_0375  | Glycerol kinase                                                | Diff expr  | up   |      |      |       |      |      |      |
| maeB                                           | APL_0486  | NADP-dependent malic enzyme (NADP-ME)                          | Diff expr  |      |      | down |       |      |      |      |
| nfnB                                           | APL_0607  | Putative NAD(P)H nitroreductase                                | Diff expr  | down |      |      |       |      |      |      |
| torZ                                           | APL_0688  | Trimethylamine-N-oxide reductase precursor                     | Diff expr  |      |      | down |       |      |      |      |
| lpdA                                           | APL_0771  | Dihydrolipoyl dehydrogenase                                    | Diff expr  | down |      | down |       |      |      | STM* |
| dcuC                                           | APL_0870  | Putative C4-dicarboxylate transporter                          | Diff expr  | up   |      | up   |       |      | up   |      |
| hyaA                                           | APL_1331  | Hydrogenase 2 small subunit                                    | Diff expr  |      | up   | up   |       |      |      |      |
| hybB                                           | APL_1333  | Putative Ni/Fe-hydrogenase 2 b-type cytochrome subunit         | Diff expr  | up   |      | up   |       |      |      |      |
| hyaB                                           | APL_1334  | Hydrogenase-2 large chain                                      | Diff expr  |      | up   |      |       |      |      |      |
| dmsA                                           | APL_1674  | Anaerobic dimethyl sulfoxide reductase chain A precursor       | Diff expr  |      | up   |      | SCOTS |      |      |      |
| atpD                                           | APL_1646  | ATP synthase subunit beta                                      | High expr  |      |      |      |       | HITS |      |      |
| nqrB                                           | APL_0151  | Na(+)-translocating NADH-quinone reductase subunit B           | High expr  |      | up   |      |       |      |      |      |
| nqrA                                           | APL_0150  | NADH:ubiquinone oxidoreductase, Na(+)-translocating, A subunit | High expr  |      |      |      |       |      |      | STM  |
| pflB                                           | APL_1036  | Formate acetyltransferase                                      | High expr  |      |      |      |       |      | down |      |
| atpC                                           | APL_1645  | ATP synthase epsilon chain                                     | High expr  |      | up   |      |       |      |      |      |
| nqrC                                           | APL_0152  | Na(+)-translocating NADH-quinone reductase subunit C           | High expr  |      | up   |      |       |      |      |      |
| atpA                                           | APL_1648  | ATP synthase subunit alpha                                     | High expr  |      |      |      |       |      |      | STM  |
| ackA                                           | APL_0645  | Acetate kinase                                                 | High expr  |      |      | down |       |      |      |      |
| nqrE                                           | APL_0154  | Na(+)-translocating NADH-quinone reductase subunit E           | High expr  |      | up   |      |       |      |      |      |
| APL_1591                                       | APL_1591  | Flavodoxin/protoporphyrinogen oxidase                          | Diff expr  |      |      |      |       | HITS |      |      |
| <i>Cell cycle control, mitosis and meiosis</i> |           |                                                                |            |      |      |      |       |      |      |      |
| fstE                                           | APL_1345  | Cell division ATP-binding protein                              | Diff expr  |      |      |      |       | HITS |      |      |
| ftsN                                           | APL_1870  | Possible cell division protein                                 | Diff expr  |      |      |      |       | HITS |      |      |
| <i>Amino acid transport and metabolism</i>     |           |                                                                |            |      |      |      |       |      |      |      |
| leuC                                           | APL_0139  | 3-isopropylmalate dehydratase large subunit 2                  | Diff expr  | up   | down | up   |       |      | up   |      |
| APL_0848                                       | APL_0848  | Putative ABC transporter periplasmic binding protein           | Diff expr  | up   |      |      |       |      |      |      |
| lysE                                           | APL_1046  | Lysine exporter protein                                        | Diff expr  |      | down |      |       |      |      |      |
| pepA                                           | APL_1101  | Probable cytosol aminopeptidase                                | Diff expr  |      |      |      |       |      | up   |      |
| thrC                                           | APL_1499  | Threonine synthase                                             | Diff expr  |      |      |      |       |      | up   | STM  |
| glnB                                           | APL_1518  | Nitrogen regulatory protein P-II                               | Diff expr  |      |      |      |       | HITS |      |      |
| ureA                                           | APL_1618  | Urease subunit gamma                                           | Diff expr  |      |      |      |       |      | up   |      |
| neuA                                           | APL_1751  | Acylneuraminate cytidyltransferase                             | Diff expr  | up   |      |      |       |      |      |      |
| proA                                           | APL_1951  | Gamma-glutamyl phosphate reductase                             | Diff expr  |      |      | up   |       |      |      |      |
| ilvE                                           | APL_0072  | Branched-chain amino acid aminotransferase                     | Diff expr  |      |      |      |       | HITS | up   |      |
| ilvC                                           | APL_1853  | Ketol-acid reductoisomerase                                    | High expr  |      |      |      |       |      | up   |      |
| <i>Nucleotide transport and metabolism</i>     |           |                                                                |            |      |      |      |       |      |      |      |

|                                              |          |                                                            |           |      |      |      |      |
|----------------------------------------------|----------|------------------------------------------------------------|-----------|------|------|------|------|
| cpdB                                         | APL_0646 | 2',3'-cyclic-nucleotide 2'-phosphodiesterase               | Diff expr | down | down |      |      |
| cdd                                          | APL_1343 | Cytidine deaminase                                         | Diff expr |      |      | up   |      |
| prsA                                         | APL_0775 | Ribose-phosphate pyrophosphokinase                         | Diff expr | up   | up   |      |      |
| <i>Carbohydrate transport and metabolism</i> |          |                                                            |           |      |      |      |      |
| glxK                                         | APL_0142 | Glycerat kinase                                            | Diff expr |      |      | up   |      |
| glpF                                         | APL_0374 | Glycerol uptake facilitator protein                        | Diff expr |      | down |      |      |
| glpT                                         | APL_0377 | Glycerol-3-phosphate transporter                           | Diff expr |      |      | up   |      |
| pgm                                          | APL_0591 | Phosphoglucomutase/phosphomannomutase                      | Diff expr |      |      | HITS |      |
| APL_0707                                     | APL_0707 | Putative uncharacterized protein                           | Diff expr |      | up   |      |      |
| tktA                                         | APL_0983 | Transketolase 2                                            | Diff expr |      | down | up   |      |
| malK                                         | APL_1236 | Maltose/maltodextrin import ATP-binding protein            | Diff expr | up   |      |      |      |
| malG                                         | APL_1239 | Maltose transport system permease protein                  | Diff expr | up   | up   |      |      |
| malQ                                         | APL_1240 | 4-alpha-glucanotransferase                                 | Diff expr | up   |      |      |      |
| mgIA                                         | APL_1419 | Galactoside transport ATP-binding protein                  | Diff expr |      |      |      | STM  |
| mgsA                                         | APL_1498 | Methylglyoxal synthase                                     | Diff expr |      |      | HITS | down |
| mtIA                                         | APL_1630 | PTS system mannitol-specific EIICBA component              | Diff expr |      | down |      |      |
| rbsB                                         | APL_1672 | D-ribose-binding periplasmic protein                       | Diff expr |      | down |      |      |
| ulaD                                         | APL_1698 | Probable 3-keto-L-gulonate-6-phosphate decarboxylase       | Diff expr | up   |      |      |      |
| nanE                                         | APL_1752 | Putative N-acetylmannosamine-6-phosphate 2-epimerase       | Diff expr | up   |      |      |      |
| nagB                                         | APL_1755 | Glucosamine-6-phosphate deaminase                          | Diff expr | up   |      | HITS |      |
| rpe                                          | APL_1820 | Ribulose-phosphate 3-epimerase                             | Diff expr |      | up   |      |      |
| xylA                                         | APL_1908 | Xylose isomerase                                           | Diff expr |      | down | up   |      |
| xylH                                         | APL_1911 | ABC-type xylose transport system, permease component       | Diff expr |      | down |      |      |
| fba                                          | APL_1250 | Fructose-bisphosphate aldolase                             | High expr |      | down |      |      |
| gapA                                         | APL_0434 | Glyceraldehyde-3-phosphate dehydrogenase                   | High expr |      | down |      |      |
| APL_0141                                     | APL_0141 | Uncharacterized transporter                                | Diff expr | up   |      |      |      |
| ulaC                                         | APL_1699 | Ascorbate-specific phosphotransferase enzyme IIA component | Diff expr | up   |      |      |      |
| ptsN                                         | APL_0335 | PTS system, nitrogen regulatory IIA-like protein           | High expr |      | up   |      |      |
| <i>Coenzyme transport and metabolism</i>     |          |                                                            |           |      |      |      |      |
| chuW                                         | APL_1523 | Coproporphyrinogen III oxidase                             | Diff expr |      | up   |      |      |
| hemH                                         | APL_1937 | Ferrochelataase                                            | Diff expr |      |      | HITS |      |
| hemX                                         | APL_1008 | Putative uroporphyrin-III C-methyltransferase              | High expr | down |      |      |      |
| serC                                         | APL_0702 | Phosphoserine aminotransferase                             | Diff expr |      |      | up   |      |
| rimK                                         | APL_0484 | Ribosomal protein S6 modification protein                  | Diff expr |      |      | up   |      |
| dxs                                          | APL_0207 | 1-deoxy-D-xylulose-5-phosphate synthase                    | High expr |      |      | down |      |
| <i>Lipid transport and metabolism</i>        |          |                                                            |           |      |      |      |      |
| APL_0971                                     | APL_0971 | Putative acyl CoA thioester hydrolase                      | High expr |      |      | up   |      |
| plsX                                         | APL_1385 | Phosphate acyltransferase                                  | High expr |      |      | down |      |
| <i>Translation</i>                           |          |                                                            |           |      |      |      |      |
| rplQ                                         | APL_1785 | 50S ribosomal protein L17                                  | High expr |      | up   |      |      |
| rpsQ                                         | APL_1769 | 30S ribosomal protein S17                                  | High expr |      | up   |      |      |
| rpsJ                                         | APL_1759 | 30S ribosomal protein S10                                  | High expr | down |      |      |      |

|                                                                     |          |                                                 |                |      |      |       |      |
|---------------------------------------------------------------------|----------|-------------------------------------------------|----------------|------|------|-------|------|
| rpsM                                                                | APL_1781 | 30S ribosomal protein S13                       | High expr      |      |      |       | down |
| rplI                                                                | APL_1169 | 50S ribosomal protein L9                        | High expr      | down |      |       |      |
| rplL                                                                | APL_1721 | 50S ribosomal protein L7/L12                    | High expr      |      | up   |       |      |
| tufB                                                                | APL_1398 | Elongation factor Tu                            | High expr      |      |      | SCOTS |      |
| rpsL                                                                | APL_0601 | 30S ribosomal protein S9                        | High expr      |      | up   |       |      |
| rpsK                                                                | APL_1782 | 30S ribosomal protein S11                       | High expr      | down |      |       |      |
| rpmF                                                                | APL_1386 | 50S ribosomal protein L32                       | High expr      |      |      |       | STM* |
| rpsA                                                                | APL_0740 | 30S ribosomal protein S1                        | High expr      |      |      | down  |      |
| rplX                                                                | APL_1770 | 50S ribosomal protein L24                       | High expr      |      | up   |       |      |
| <i>Transcription</i>                                                |          |                                                 |                |      |      |       |      |
| nusA                                                                | APL_0638 | Transcription elongation protein                | Diff expr/high |      | up   |       |      |
| APL_0932                                                            | APL_0932 | Putative HTH-type transcriptional regulator     | High expr      |      | down |       |      |
| nusG                                                                | APL_1717 | Transcription antitermination protein           | High expr      | down |      |       |      |
| rho                                                                 | APL_0247 | Transcription termination factor                | High expr      |      | up   |       |      |
| <i>Replication, recombination and repair</i>                        |          |                                                 |                |      |      |       |      |
| recC                                                                | APL_1884 | Exodeoxyribonuclease V gamma chain              | Diff expr      |      |      | HITS  |      |
| tagL                                                                | APL_1931 | 3-methyladenine-DNA glycosidase                 | Diff expr      |      |      |       | up   |
| priB                                                                | APL_1170 | Primosomal replication protein n                | High expr      | down |      |       |      |
| deaD                                                                | APL_0575 | Cold-shock DEAD box protein A-like protein      | High expr      |      | up   | up    |      |
| <i>Cell wall/membrane biogenesis</i>                                |          |                                                 |                |      |      |       |      |
| murD                                                                | APL_0016 | UDP-N-acetylmuramoylalanine--D-glutamate ligase | Diff expr      |      |      | up    |      |
| ompW                                                                | APL_1086 | Outer membrane protein W                        | Diff expr      |      | up   |       | down |
| murI                                                                | APL_1841 | Glutamate racemase                              | Diff expr      |      |      | up    |      |
| mltC                                                                | APL_1741 | Membrane-bound lytic murein transglycosylase C  | High expr      |      |      | HITS  |      |
| prc                                                                 | APL_0120 | Carboxy-terminal protease                       | High expr      |      |      |       | STM  |
| nlpC                                                                | APL_0359 | Putative lipoprotein                            | High expr      | down |      |       |      |
| APL_1597                                                            | APL_1597 | Possible rare lipoprotein A                     | High expr      | down |      |       |      |
| csgG                                                                | APL_0220 | Putative lipoprotein                            | High expr      | up   |      |       | up   |
| ompA                                                                | APL_1421 | Outer membrane protein P5 precursor             | High expr      |      |      | SCOTS |      |
| ompA                                                                | APL_1852 | Outer membrane protein P5 precursor (OMP P5)    | High expr      |      |      |       | STM* |
| <i>Cell motility</i>                                                |          |                                                 |                |      |      |       |      |
| apfB/hofB                                                           | APL_0879 | Fimbrial biogenesis protein                     | Diff expr      | up   |      |       |      |
| <i>Posttranslational modification, protein turnover, chaperones</i> |          |                                                 |                |      |      |       |      |
| hypF                                                                | APL_1330 | Hypothetical carbamoyltransferase               | Diff expr      |      |      | up    |      |
| tpx                                                                 | APL_1489 | Thiol peroxidase                                | Diff expr      |      |      |       | up   |
| ureE                                                                | APL_1614 | Urease accessory protein                        | Diff expr      |      |      |       | up   |
| ptrA                                                                | APL_1883 | Protease III                                    | Diff expr      |      |      |       | up   |
| dnaJ                                                                | APL_1905 | Chaperone protein                               | High expr      |      |      | up    | STM  |
| dnaK                                                                | APL_1906 | Chaperone protein                               | High expr      |      |      | SCOTS | STM* |
| ureG                                                                | APL_1612 | Urease accessory protein                        | Diff expr      |      |      |       | up   |
| <i>Inorganic ion transport and metabolism</i>                       |          |                                                 |                |      |      |       |      |
| nrfB                                                                | APL_0101 | Cytochrome c-type protein                       | Diff expr      |      | up   | down  |      |

|                                                                     |          |                                                             |                |      |      |       |      |
|---------------------------------------------------------------------|----------|-------------------------------------------------------------|----------------|------|------|-------|------|
| nhaB                                                                | APL_0322 | Na(+)/H(+) antiporter                                       | Diff expr      |      | up   |       | HITS |
| APL_0668                                                            | APL_0668 | Possible periplasmic iron (Fe) transport lipoprotein        | Diff expr      | up   | up   |       |      |
| ywbN                                                                | APL_0669 | Tat-translocated enzyme, putative iron dependent peroxidase | Diff expr      |      |      |       | down |
| kefBC                                                               | APL_1053 | Glutathione-regulated potassium-efflux system protein       | Diff expr      |      |      | SCOTS |      |
| tehA                                                                | APL_1212 | Tellurite resistance protein and related permease           | Diff expr      |      |      |       | down |
| copA                                                                | APL_1265 | Copper-transporting P-type ATPase                           | Diff expr      |      |      | SCOTS |      |
| APL_1285                                                            | APL_1285 | Rhodanese-related sulfurtransferase                         | Diff expr      |      |      |       |      |
| ccp                                                                 | APL_1379 | Cytochrome c peroxidase                                     | Diff expr      |      | up   | down  |      |
| APL_0719                                                            | APL_0719 | Putative phosphate permease                                 | High expr      |      |      | down  |      |
| APL_1508                                                            | APL_1508 | Rhodanese-related sulfurtransferase                         | High expr      | down |      |       |      |
| fur                                                                 | APL_1218 | Ferric uptake regulator                                     | High expr      | down |      |       |      |
| hmuV/fecE                                                           | APL_1793 | Hemin ABC superfamily ATP binding cassette transporter      | Diff expr      |      |      | up    |      |
| <i>Secondary metabolites biosynthesis, transport and catabolism</i> |          |                                                             |                |      |      |       |      |
| APL_1423                                                            | APL_1423 | Putative uncharacterized protein                            | Diff expr      |      |      |       | up   |
| <i>Signal transduction mechanisms</i>                               |          |                                                             |                |      |      |       |      |
| typA                                                                | APL_0053 | GTP-binding protein                                         | High expr      |      |      |       | down |
| <i>Intracellular trafficking and secretion</i>                      |          |                                                             |                |      |      |       |      |
| ftsY                                                                | APL_1346 | Cell division protein FtsY-like protein                     | Diff expr      |      |      |       | down |
| tatA                                                                | APL_1985 | Sec-independent protein translocase protein                 | Diff expr      |      |      | HITS  |      |
| secF                                                                | APL_1068 | Protein-export membrane protein SecF                        | High expr      |      |      |       | down |
| secB                                                                | APL_1509 | Protein-export protein secB                                 | High expr      | down | up   |       |      |
| tatB                                                                | APL_1986 | Sec-independent protein translocase-like protein            | High expr      |      |      | HITS  |      |
| <i>Defence mechanisms</i>                                           |          |                                                             |                |      |      |       |      |
| apxID                                                               | APL_1442 | RTX-I toxin secretion component                             | High expr      |      |      |       | down |
| <i>General function prediction only</i>                             |          |                                                             |                |      |      |       |      |
| APL_0047                                                            | APL_0047 | Diadenosine tetraphosphatase                                | Diff expr      |      |      | SCOTS |      |
| ompP4                                                               | APL_0389 | Lipoprotein E                                               | Diff expr      |      |      | down  | HITS |
| APL_0885                                                            | APL_0885 | Permease with 5 transmembrane domains                       | Diff expr      |      | down |       |      |
| APL_0966                                                            | APL_0966 | Putative transport protein                                  | Diff expr      | up   |      |       |      |
| APL_1044                                                            | APL_1044 | Permease                                                    | Diff expr      | up   |      |       |      |
| dcuB2                                                               | APL_1316 | Anaerobic C4-dicarboxylate transporter                      | Diff expr      |      |      | SCOTS |      |
| APL_1355                                                            | APL_1355 | Phospholipid-binding protein                                | Diff expr      |      |      |       | up   |
| ulaG                                                                | APL_1701 | L-ascorbate-6-phosphate lactonase                           | Diff expr      | up   |      |       |      |
| trmB                                                                | APL_1383 | tRNA (guanine-N(7)-)-methyltransferase                      | High expr      |      | up   |       | down |
| sspB                                                                | APL_0657 | ClpXP protease specificity-enhancing factor                 | High expr      | down |      |       |      |
| nlpl                                                                | APL_0576 | Lipoprotein Nlpl-like                                       | High expr      | down | up   |       |      |
| <i>Function unknown</i>                                             |          |                                                             |                |      |      |       |      |
| APL_0179                                                            | APL_0179 | Putative uncharacterized protein                            | Diff expr      |      |      |       | down |
| rimP                                                                | APL_0637 | Ribosome maturation factor                                  | Diff expr/high |      | up   |       |      |
| APL_1284                                                            | APL_1284 | Putative DNA-binding protein                                | Diff expr      |      |      | down  |      |
| APL_1360                                                            | APL_1360 | Putative uncharacterized protein                            | Diff expr      |      | up   |       |      |
| ulaA (sgaT)                                                         | APL_1700 | PTS system ascorbate-specific transporter subunits IICB     | Diff expr      | up   |      | up    |      |

|          |          |                                            |           |      |    |
|----------|----------|--------------------------------------------|-----------|------|----|
| APL_1894 | APL_1894 | Putative uncharacterized protein           | Diff expr |      | up |
| APL_0116 | APL_0116 | Putative DNA polymerase III subunit delta' | High expr | down |    |

Comparison of *A. pleuropneumoniae* , serotype 2 and 6, genes identified as differentially regulated or highly expressed in this study with:

I: *In vivo* infection with *A. pleuropneumoniae*, serotype 5b, (acute phase of natural infection) [11].

II: *A. pleuropneumoniae*, serotype 1, grown in BALF (30 min exposure) [21].

III: *A. pleuropneumoniae* grown on SJPL cells (for 3 h) [17].

IV: Genes expressed by *A. pleuropneumoniae*, serotype 9, in necrotic porcine lung tissue (7 days p.i.) [18].

V: Genes required by *H. influenzae* for survival in an experimental murine lung model [25].

VI: Genes regulated in *A. pleuropneumoniae*, serotype 1, during biofilm formation *in vitro* [22].

VII: Genes required for survival of *A. pleuropneumoniae* , serotype 1, in the porcine lung [15,17]. \* Identified in both STM studies.
